# Supplementary material for: A novel Foxp3-related immune prognostic signature for glioblastoma multiforme based on immunogenomic profiling
Source: publisher site journal article supplement (doi:10.18632/aging.202282), 2021-01-10
Supplement: Supplementary file [file aging-v13i3-202282-supplementary-material-SD1.pdf]

**SUPPLEMENTARY FIGURES**

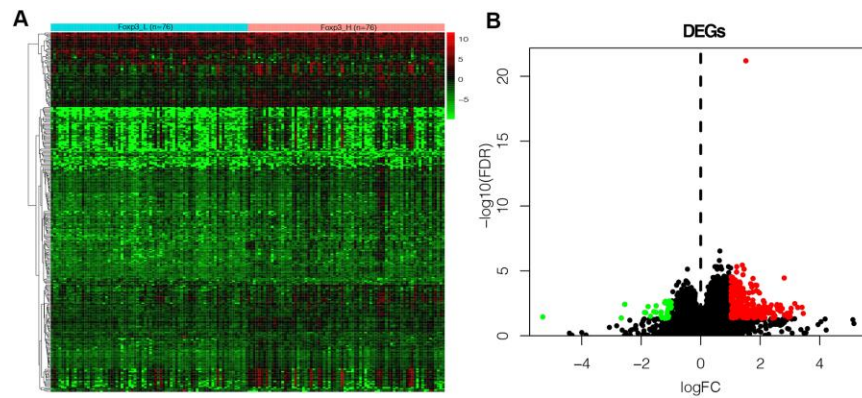

**Supplementary Figure 1. Identification of Foxp3-associated differentially expressed genes.** (A) Heatmap of genes differentially expressed between Foxp3\_H and Foxp3\_L. (B) Volcano plot of 294 genes differentially expressed between Foxp3\_H and Foxp3\_L.

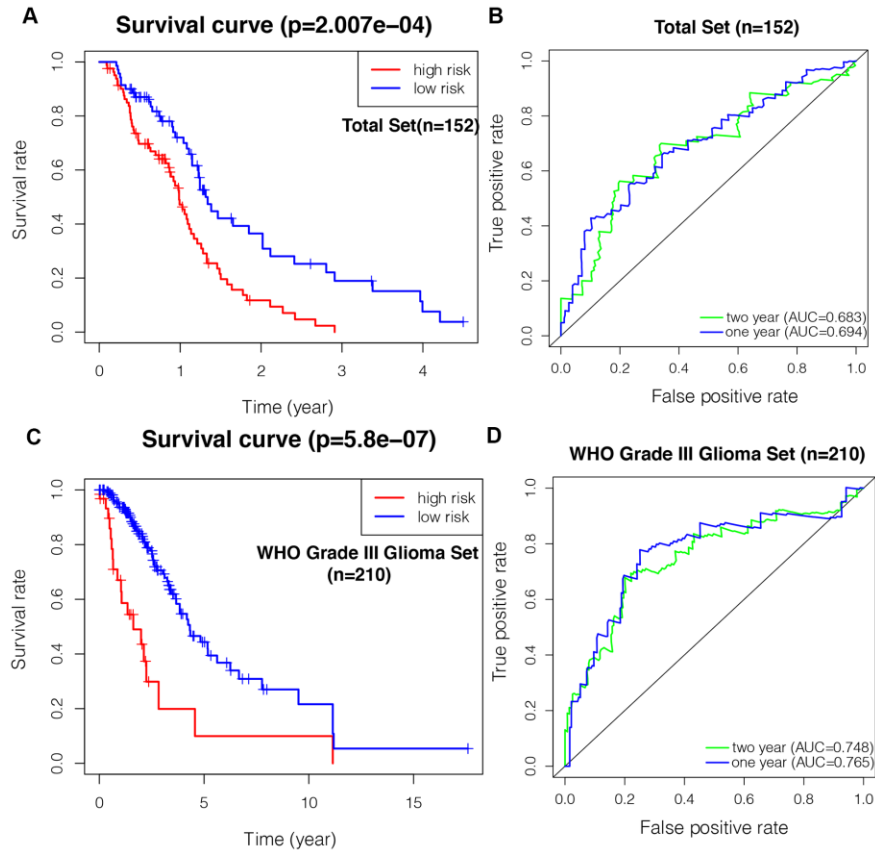

**Supplementary Figure 2. The prognostic value of the IPS in the total set, containing the training set, the validation set, and WHO grade III gliomas set.** (A) Kaplan–Meier curves of overall survival based on the IPS in the total set (n=152). (B) ROC curve analysis of the IPS in the total set (n=152). (C) Kaplan–Meier curves of overall survival based on the IPS in the WHO grade III gliomas set (n=210). (D) ROC curve analysis of the IPS in the WHO grade III gliomas set (n=210).

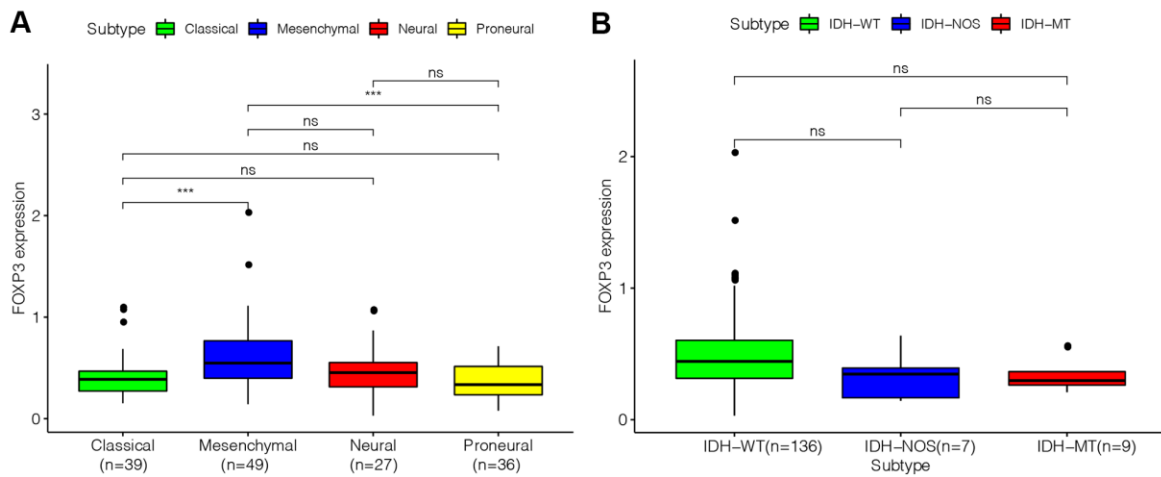

**Supplementary Figure 3. FOXP3 expression in GBM with different subtypes and IDH status. (A)** FOXP3 expression in GBM with different subtypes. **(B)** FOXP3 expression in GBM with IDH status. \* $P < 0.05$ , \*\* $P < 0.01$ , \*\*\* $P < 0.001$ .

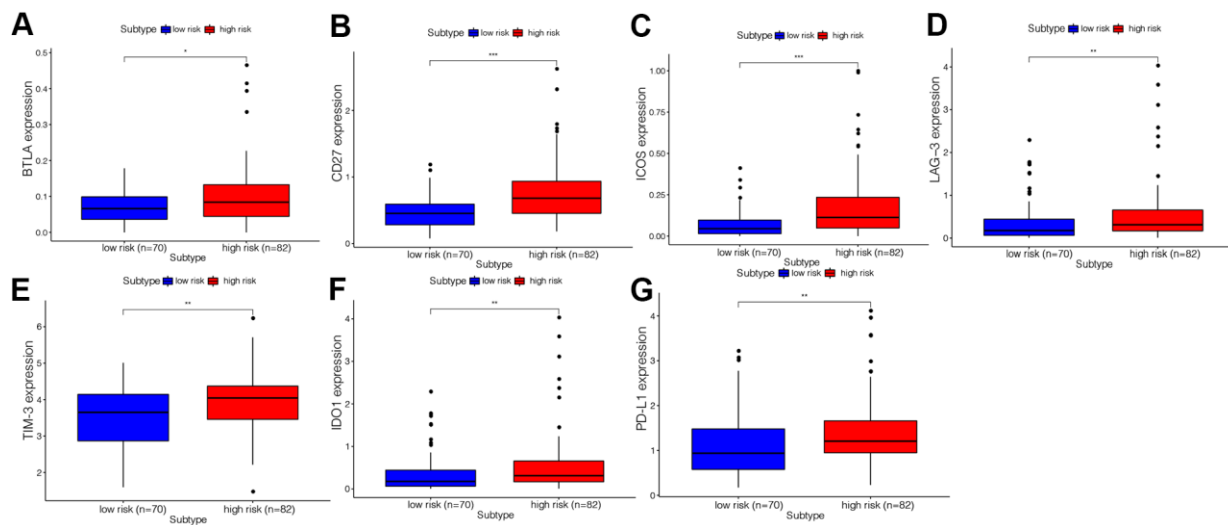

**Supplementary Figure 4. Comparison of immune checkpoint gene expression levels between high risk and low risk using ANOVA test. \* $P < 0.05$ , \*\* $P < 0.01$ , \*\*\* $P < 0.001$ .**
